# Supplementary material
Source: MDPI journal article supplement (https://www.mdpi.com/2072-4292/15/9/2413)
Supplement: s1 [file s1]

## Supplemental Information

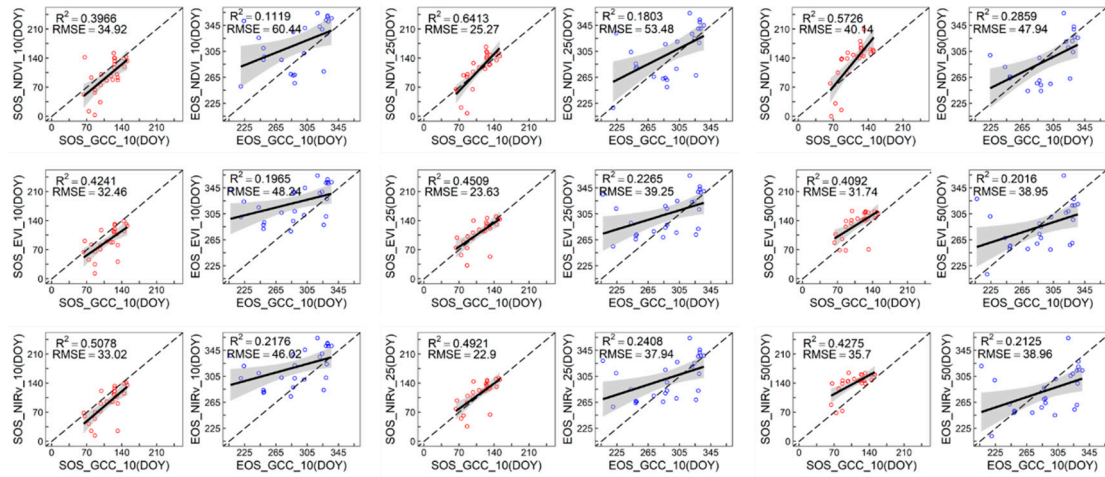

**Figure S1.** Wetland vegetation phenology results based on the fusion of Landsat and Sentinel-2 (LandSent30) at 15m extracted buffer (10% of the green chromatic coordinate (GCC) amplitude).

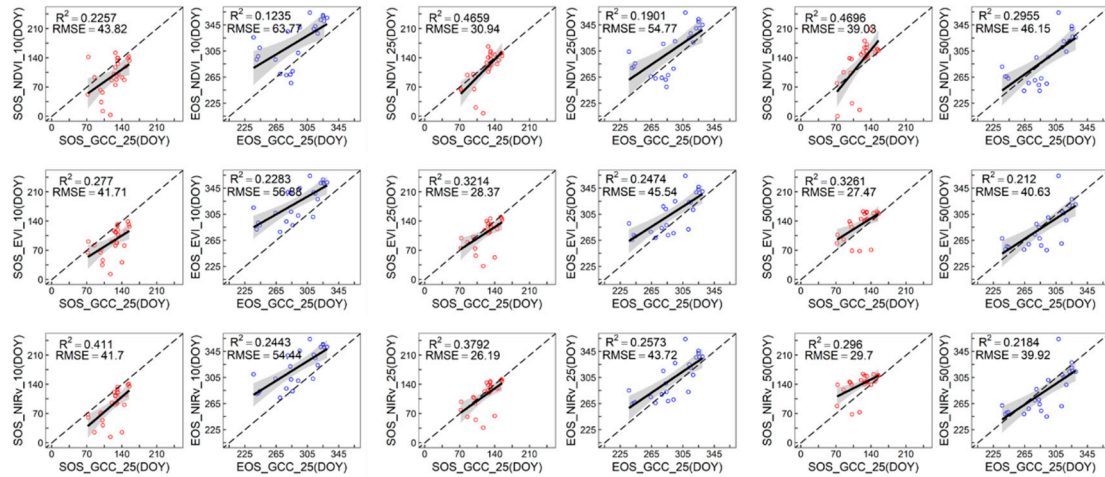

**Figure S2.** Wetland vegetation phenology results based on the fused LandSent30 at 15m buffer (25% of the GCC amplitude).

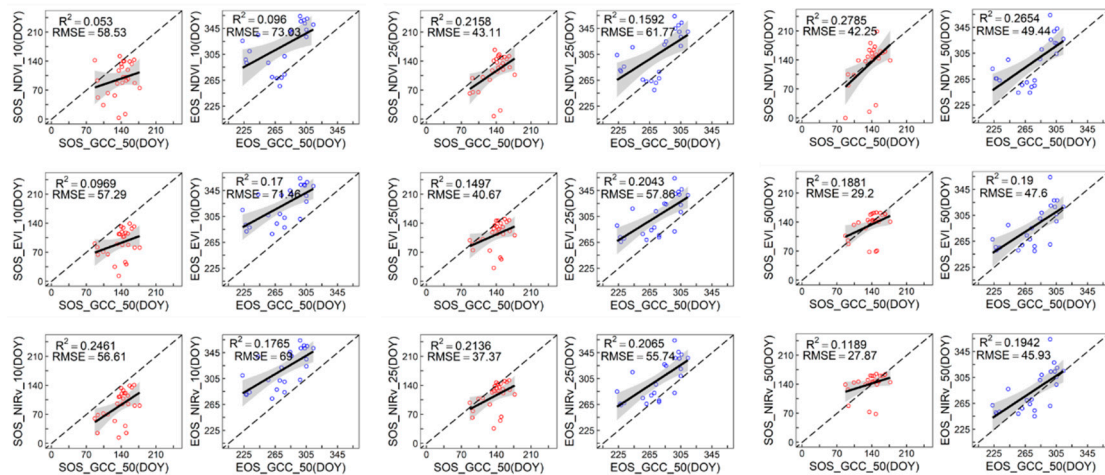

**Figure S3.** Wetland vegetation phenology results based on the fused LandSent30 at 15m buffer (50% of the GCC amplitude).

**Table S1.** Differences in the phenology of wetland vegetation (PWV) estimated by satellite remote sensing with different spatial resolutions at 15m buffer (10% of the GCC amplitude and 50% of the vegetation indices).

| Remote sensing index | Statistic      | SOS             | EOS             |
|----------------------|----------------|-----------------|-----------------|
|                      |                | Landsat   MODIS | Landsat   MODIS |
| NDVI                 | R <sup>2</sup> | 0.35   0.04     | 0.14   0.41     |
|                      | RMSE           | 46.92   39.85   | 57.80   37.07   |
|                      | Bias           | 28.50   8.64    | -9.68   -2.11   |
| EVI                  | R <sup>2</sup> | 0.24   0.06     | 0.12   0.30     |
|                      | RMSE           | 35.12   37.35   | 46.02   39.09   |
|                      | Bias           | 18.54   4.36    | -4.11   -8.21   |
| NIRv                 | R <sup>2</sup> | 0.27   0.04     | 0.13   0.31     |
|                      | RMSE           | 36.78   39.11   | 45.80   40.01   |
|                      | Bias           | 24.46   8.00    | -7.71   -11.68  |

**Table S2.** Differences in PWV estimated by satellite remote sensing with different spatial resolutions at 30m buffer (10% of the GCC amplitude and 25% of the vegetation indices).

| Remote sensing index | Statistic      | SOS             | EOS             |
|----------------------|----------------|-----------------|-----------------|
|                      |                | Landsat   MODIS | Landsat   MODIS |
| NDVI                 | R <sup>2</sup> | 0.24   0.11     | 0.00   0.48     |
|                      | RMSE           | 35.76   39.02   | 91.47   54.00   |
|                      | Bias           | -5.32   -12.57  | 15.46   18.57   |
| EVI                  | R <sup>2</sup> | 0.22   0.18     | 0.04   0.02     |
|                      | RMSE           | 33.34   37.91   | 73.87   76.54   |
|                      | Bias           | -4.68   -16.36  | 24.93   26.61   |
| NIRv                 | R <sup>2</sup> | 0.19   0.14     | 0.23   0.02     |
|                      | RMSE           | 30.6   37.06    | 64.32   76.29   |
|                      | Bias           | -0.07   -11.89  | 20.61   23.82   |

**Table S3.** Differences in PWV estimated by satellite remote sensing with different spatial resolutions at 45m buffer (10% of the GCC amplitude and 50% of the vegetation indices).

| Remote sensing index | Statistic      | SOS             | EOS             |
|----------------------|----------------|-----------------|-----------------|
|                      |                | Landsat   MODIS | Landsat   MODIS |
| NDVI                 | R <sup>2</sup> | 0.22   0.13     | 0.02   0.57     |
|                      | RMSE           | 50.24   38.96   | 75.86   44.98   |
|                      | Bias           | 27.63   7.40    | 8.97   2.10     |
| EVI                  | R <sup>2</sup> | 0.36   0.15     | 0.05   0.05     |
|                      | RMSE           | 33.17   36.96   | 68.68   69.25   |
|                      | Bias           | 13.43   3.43    | 8.17   1.40     |
| NIRv                 | R <sup>2</sup> | 0.42   0.12     | 0.16   0.04     |
|                      | RMSE           | 32.80   38.50   | 63.06   69.76   |
|                      | Bias           | 17.83   7.07    | 5.10   -1.87    |

**Table S4.** Differences in PWV estimated by satellite remote sensing with different spatial resolutions at 60m buffer (10% of the GCC amplitude and 50% of the vegetation indices).

| Remote sensing index | Statistic      | SOS             | EOS             |
|----------------------|----------------|-----------------|-----------------|
|                      |                | Landsat   MODIS | Landsat   MODIS |
| NDVI                 | R <sup>2</sup> | 0.19   0.13     | 0.02   0.57     |
|                      | RMSE           | 49.31   38.96   | 75.72   44.98   |
|                      | Bias           | 31.43   7.40    | 9.30   2.10     |
| EVI                  | R <sup>2</sup> | 0.35   0.15     | 0.05   0.05     |
|                      | RMSE           | 33.14   36.96   | 69.12   69.25   |
|                      | Bias           | 10.87   3.43    | 8.70   1.40     |
| NIRv                 | R <sup>2</sup> | 0.40   0.12     | 0.06   0.04     |
|                      | RMSE           | 32.46   38.50   | 68.16   69.76   |
|                      | Bias           | 16.30   7.07    | 6.43   -1.87    |

**Table S5.** Differences in PWV estimated by satellite remote sensing with different spatial resolutions at 90m buffer (25% of the GCC amplitude and 50% of the vegetation indices).

| Remote sensing index | Statistic      | SOS             | EOS             |
|----------------------|----------------|-----------------|-----------------|
|                      |                | Landsat   MODIS | Landsat   MODIS |
| NDVI                 | R <sup>2</sup> | 0.21   0.16     | 0.29   0.15     |
|                      | RMSE           | 40.71   36.47   | 46.10   53.99   |
|                      | Bias           | 13.83   -2.24   | 8.83   -1.66    |
| EVI                  | R <sup>2</sup> | 0.35   0.14     | 0.20   0.37     |
|                      | RMSE           | 28.73   36.85   | 45.09   39.15   |
|                      | Bias           | 1.83   -5.45    | 5.03   -0.31    |
| NIRv                 | R <sup>2</sup> | 0.42   0.13     | 0.16   0.38     |
|                      | RMSE           | 26.75   36.88   | 46.43   39.01   |
|                      | Bias           | 7.97   -1.66    | 2.17   -3.55    |

**Table S6.** Differences in PWV estimated by satellite remote sensing with different spatial resolutions at 120m buffer (25% of the GCC amplitude and 50% of the vegetation indices).

| Remote sensing index | Statistic      | SOS             | EOS             |
|----------------------|----------------|-----------------|-----------------|
|                      |                | Landsat   MODIS | Landsat   MODIS |
| NDVI                 | R <sup>2</sup> | 0.18   0.16     | 0.29   0.15     |
|                      | RMSE           | 41.88   36.47   | 45.78   53.99   |
|                      | Bias           | 16.79   -2.24   | 8.59   -1.66    |
| EVI                  | R <sup>2</sup> | 0.28   0.14     | 0.17   0.37     |
|                      | RMSE           | 30.41   36.85   | 45.78   39.15   |
|                      | Bias           | 4.38   -5.45    | 2.72   -0.31    |
| NIRv                 | R <sup>2</sup> | 0.24   0.13     | 0.17   0.38     |
|                      | RMSE           | 32.02   36.88   | 45.94   39.01   |
|                      | Bias           | 8.52   -1.66    | 0.62   -3.55    |

**Table S7.** Differences in PWV estimated by satellite remote sensing with different spatial resolutions at 150m buffer (25% of the GCC amplitude and 50% of the vegetation indices).

| Remote sensing index | Statistic      | SOS             | EOS             |
|----------------------|----------------|-----------------|-----------------|
|                      |                | Landsat   MODIS | Landsat   MODIS |
| NDVI                 | R <sup>2</sup> | 0.24   0.16     | 0.26   0.15     |
|                      | RMSE           | 37.52   37.04   | 49.59   54.47   |
|                      | Bias           | 5.89   -2.79    | 12.21   -3.07   |
| EVI                  | R <sup>2</sup> | 0.20   0.13     | 0.18   0.38     |
|                      | RMSE           | 31.49   37.33   | 46.03   39.70   |
|                      | Bias           | 3.75   -4.96    | 2.11   0.32     |
| NIR <sub>v</sub>     | R <sup>2</sup> | 0.14   0.12     | 0.19   0.39     |
|                      | RMSE           | 34.47   37.48   | 45.89   39.35   |
|                      | Bias           | 7.86   -1.32    | -0.46   -2.68   |
